# Supplementary material for: Association of Dietary Patterns with Cardiovascular and Kidney Phenotypes in an Uruguayan Population Cohort
Source: MDPI journal article supplement (doi:10.3390/nu13072213), 2021-06-27
Supplement: s1 [file s1]

## SUPPLEMENTARY INFORMATION

### Association of Dietary Patterns with Cardiovascular and Kidney Phenotypes in a Uruguayan Population Cohort

**Paula Moliterno <sup>1</sup>, Carmen Marino Donangelo <sup>2</sup>, Luciana Borgarello <sup>3</sup>, Matías Pécora <sup>4</sup>, Alicia Olascoaga <sup>3</sup>, Oscar Noboa <sup>5</sup> and José Boggia <sup>5,\*</sup>**

<sup>1</sup> Departamento de Nutrición Clínica. Escuela de Nutrición. Universidad de la República, Uruguay; pmoliterno@nutricion.edu.uy

<sup>2</sup> Escuela de Nutrición. Universidad de la República, Uruguay; cmarino@nutricion.edu.uy

<sup>3</sup> Laboratorio de Patología Clínica, Universidad de la República, Uruguay; luborga@hotmail.com (L.B.); aolascoa@gmail.com (A.O.)

<sup>4</sup> Departamento de Fisiopatología, Universidad de la República, Uruguay; pecora.matias@gmail.com

<sup>5</sup> Centro de Nefrología, Universidad de la República, Uruguay; onoboa@gmail.com (O.N.); jboggia@hc.edu.uy (J.B.)

\* Correspondence: jboggia@hc.edu.uy

Number of Tables 7

**Table S1.** Characteristics of participants according to age categories †.

| Variable                           | Age ≤ 54 years<br>(n=138) | Age > 54 years<br>(n=156) | p-Value* |
|------------------------------------|---------------------------|---------------------------|----------|
| Female                             | 94 (68.1)                 | 105 (67.3)                | 0.88     |
| Education ≤ 9 years                | 74 (53.6)                 | 115 (73.7)                | 0.0003   |
| Low physical activity              | 101 (73.2)                | 121 (77.6)                | 0.38     |
| Current smokers                    | 31 (24.4)                 | 24 (16.2)                 | 0.090    |
| Alcohol use                        | 48 (37.8)                 | 49 (33.1)                 | 0.42     |
| Hypertension                       | 20 (14.5)                 | 87 (55.8)                 | <0.0001  |
| On antihypertensive drugs †        | 12 (60.0)                 | 70 (80.5)                 | 0.076    |
| Uncontrolled Hypertension -OBP     | 13 (9.4)                  | 47 (30.1)                 | <0.0001  |
| Uncontrolled Hypertension -ABPM    | 41 (36.6)                 | 16 (19.8)                 | 0.011    |
| Diabetes                           | 2 (1.5)                   | 28 (18.6)                 | <0.0001  |
| Obesity                            | 54 (39.1)                 | 62 (39.7)                 | 0.91     |
| Vitamin D deficiency               | 13 (9.4)                  | 10 (6.4)                  | 0.34     |
| Chronic kidney disease             | 3 (3.4)                   | 8 (11.9)                  | 0.057    |
| Nephrolithiasis                    | 11 (8.0)                  | 26 (16.7)                 | 0.025    |
| Fasting glucose (mg/dl)            | 89.6±10.9                 | 104.2±33.2                | <0.0001  |
| Total cholesterol (mg/dl)          | 195.8±34.7                | 214.6±46.6                | <0.0001  |
| Triglyceride (mg/dl)               | 124.4±73.7                | 146.3±80.3                | 0.016    |
| LDLc (mg/dl)                       | 117.1±31.3                | 132.7±37.4                | 0.0001   |
| HDLc (mg/dl)                       | 52.6±13.4                 | 51.8±14.5                 | 0.62     |
| Non-HDL cholesterol                | 141.9±35.2                | 162.9±43.9                | <0.0001  |
| TG/HDLc ratio                      | 2.67±2.19                 | 3.23±2.41                 | 0.040    |
| Waist/height ratio                 | 0.57±0.11                 | 0.60±0.077                | 0.0097   |
| BMI (kg/m <sup>2</sup> )           | 29.5±7.6                  | 29.5±5.1                  | 0.98     |
| HOMA-r                             | 3.06±2.43                 | 3.48±3.20                 | 0.20     |
| Neutrophils/Lymphocytes ratio      | 1.74±0.86                 | 1.80±0.77                 | 0.55     |
| Serum 25(OH)D (ng/ml)              | 23.8±9.9                  | 25.0±9.6                  | 0.26     |
| Systolic blood pressure (mm Hg)    | 118.0±13.6                | 130.5±18.6                | <0.0001  |
| Diastolic blood pressure (mm Hg)   | 77.4±8.9                  | 81.5±10.3                 | 0.0003   |
| Pulse wave velocity (m/s)          | 7.1±1.5                   | 10.0±3.1                  | <0.0001  |
| Serum creatinine                   | 0.74±0.15                 | 0.81±0.24                 | 0.0015   |
| Proteinuria (g/24-h)               | 0.14±0.085                | 0.14±0.14                 | 0.54     |
| Albumin/creatinine ratio (mg/g)    | 6.1±15.5                  | 14.6±37.2                 | 0.083    |
| eGFR (mL/min/1.73 m <sup>2</sup> ) | 108.5±15.8                | 83.8±17.0                 | <0.0001  |

† Values are mean±SD for continuous variables and n (%) for categorical variables.

\* p-Value for X<sup>2</sup> Test for categorical variables and T Student for continuous variables. †Of the hypertensive patients. OBP office blood pressure; ABPM ambulatory blood pressure monitoring (n =193); LDLc low-density lipoproteins cholesterol; HDLc high-density lipoproteins cholesterol; TG/HDLc triglycerides/high-density lipoproteins cholesterol ratio; BMI body mass index; HOMA-r Homeostasis Model Assessment of Insulin Resistance; 25(OH)D 25-hydroxy-vitamin-D; eGFR Estimated glomerular filtration rate, derived from the Chronic Kidney Disease (CKD) Epidemiology Collaboration equation. Low physical activity was defined as energy expenditure <600mets/min per week. Current smokers (yes/no), alcohol use was considered if reported drinking alcohol at least once a week (yes/no). Hypertension was defined as blood pressure of at least 140 mm Hg systolic or 90 mm Hg diastolic or use of antihypertensive drugs. Uncontrolled hypertension was defined by office blood pressure of at least 140 mm Hg systolic or 90 mm Hg diastolic, and by ABPM of at least 130 mm Hg systolic or 80 mm Hg diastolic. Diabetes was defined as self-reported diagnosis, a fasting plasma glucose of 126 mg/dl or higher, or use of antidiabetic drugs. Obesity was defined as BMI ≥30 kg/m<sup>2</sup>. Vitamin D deficiency was considered serum 25(OH)D <12 ng/ml. CKD was defined as an eGFR < 60 mL/min/1.73m<sup>2</sup> or an albumin/creatinine ratio > 30 mg/g, based on a single determination (n =155). Nephrolithiasis was defined according to report (yes/no). Pulse wave velocity was the distance in meters divided by the transit time in seconds (n =174).

**Table S2.** Characteristics of participants according to sex †.

| Variable                           | Women<br>(n=199) | Men<br>(n=95) | <i>p</i> -Value* |
|------------------------------------|------------------|---------------|------------------|
| Age (years)                        | 53.4±16.4        | 51.9±17.5     | 0.47             |
| Education ≤ 9 years                | 127 (65.3)       | 62 (63.8)     | 0.81             |
| Low physical activity              | 161 (80.9)       | 61 (64.2)     | 0.002            |
| Current smokers                    | 43 (23.4)        | 12 (13.2)     | 0.047            |
| Alcohol use                        | 50 (27.2)        | 47 (51.7)     | <0.0001          |
| Hypertension                       | 75 (37.7)        | 32 (33.7)     | 0.50             |
| On antihypertensive drugs †        | 58 (77.3)        | 24 (75.0)     | 0.79             |
| Uncontrolled Hypertension -OBP     | 42 (21.1)        | 18 (19.0)     | 0.67             |
| Uncontrolled Hypertension -ABPM    | 32 (24.1)        | 25 (41.7)     | 0.013            |
| Diabetes                           | 24 (12.1)        | 7 (7.4)       | 0.22             |
| Obesity                            | 80 (40.2)        | 36 (37.9)     | 0.71             |
| Vitamin D deficiency               | 20 (10.1)        | 3 (3.2)       | 0.04             |
| Chronic kidney disease             | 3 (5.4)          | 8 (8.1)       | 0.75             |
| Nephrolithiasis                    | 18 (9.1)         | 19 (20.0)     | 0.0081           |
| Fasting glucose (mg/dl)            | 97.9±30.3        | 96.0±14.6     | 0.46             |
| Total cholesterol (mg/dl)          | 207.9±41.0       | 201.3±45.1    | 0.21             |
| Triglyceride (mg/dl)               | 133.0±78.6       | 142.3±76.5    | 0.34             |
| LDLc (mg/dl)                       | 125.4±34.1       | 125.3±38.4    | 0.97             |
| HDLc (mg/dl)                       | 54.7±14.6        | 46.8±11.0     | <0.0001          |
| Non-HDL cholesterol                | 152.9±39.7       | 153.3±44.7    | 0.95             |
| TG/HDLc ratio                      | 2.75±2.19        | 3.42±2.52     | 0.022            |
| Waist/height ratio                 | 0.58±0.095       | 0.60±0.087    | 0.34             |
| BMI (kg/m <sup>2</sup> )           | 29.4±6.5         | 29.8±6.1      | 0.57             |
| HOMA-r                             | 3.20±3.13        | 3.44±2.23     | 0.46             |
| Neutrophils/Lymphocytes ratio      | 1.76±0.72        | 1.80±0.99     | 0.69             |
| Serum 25(OH)D (ng/ml)              | 22.3±9.6         | 28.8±8.5      | <0.0001          |
| Systolic blood pressure (mm Hg)    | 124.7±18.8       | 124.5±14.8    | 0.89             |
| Diastolic blood pressure (mm Hg)   | 79.2±10.3        | 80.5±8.9      | 0.27             |
| Pulse wave velocity (m/s)          | 8.8±2.8          | 9.2±3.3       | 0.37             |
| Serum creatinine                   | 0.71±0.18        | 0.92±0.18     | <0.0001          |
| Proteinuria (g/24-h)               | 0.14±0.13        | 0.14±0.098    | 0.83             |
| Albumin/creatinine ratio (mg/g)    | 9.2±21.8         | 10.6±35.2     | 0.79             |
| eGFR (mL/min/1.73 m <sup>2</sup> ) | 95.8±19.9        | 94.5±22.0     | 0.62             |

† Values are mean±SD for continuous variables and *n* (%) for categorical variables.

\* *p*-Value for X<sup>2</sup> Test for categorical variables and T Student for continuous variables. †Of the hypertensive patients. OBP office blood pressure; ABPM ambulatory blood pressure monitoring (*n* =193); LDLc low-density lipoproteins cholesterol; HDLc high-density lipoproteins cholesterol; TG/HDLc triglycerides/high-density lipoproteins cholesterol ratio; BMI body mass index; HOMA-r Homeostasis Model Assessment of Insulin Resistance; 25(OH)D 25-hydroxy-vitamin-D; eGFR Estimated glomerular filtration rate, derived from the Chronic Kidney Disease Epidemiology Collaboration equation. Low physical activity was defined as energy expenditure <600mets/min per week. Current smokers (yes/no), alcohol use was considered if reported drinking alcohol at least once a week (yes/no). Hypertension was defined as blood pressure of at least 140 mm Hg systolic or 90 mm Hg diastolic or use of antihypertensive drugs. Uncontrolled hypertension was defined by office blood pressure of at least 140 mm Hg systolic or 90 mm Hg diastolic; and by ABPM of at least 130 mm Hg systolic or 80 mm Hg diastolic. Diabetes was defined as self-reported diagnosis, a fasting plasma glucose of 126 mg/dl or higher, or use of antidiabetic drugs. Obesity was defined as BMI ≥30 kg/m<sup>2</sup>. Vitamin D deficiency was considered serum 25(OH)D <12 ng/ml. CKD was defined as an eGFR < 60 mL/min/1.73m<sup>2</sup> or an albumin/creatinine ratio > 30 mg/g, based on a single determination (*n* =155). Nephrolithiasis was defined according to report (yes/no). Pulse wave velocity was the distance in meters divided by the transit time in seconds (*n* =174).

**Table S3.** Demographic and anthropometric characteristics, conventional risk factors and cardiovascular and renal phenotypes by tertiles (T) of dietary pattern and age categories in Uruguayan adults.

|                                                     | Age ≤ 54 years<br>N=138 |           |           |            | Age > 54 years<br>N=156 |           |           |            |
|-----------------------------------------------------|-------------------------|-----------|-----------|------------|-------------------------|-----------|-----------|------------|
|                                                     | T1                      | T2        | T3        | <i>p</i> * | T1                      | T2        | T3        | <i>p</i> * |
| <b>Meat DP</b>                                      |                         |           |           |            |                         |           |           |            |
| <i>n</i>                                            | 26                      | 48        | 64        |            | 71                      | 51        | 34        |            |
| Female, <i>n</i> (%)                                | 22 (84.6)               | 32 (66.7) | 40 (62.5) | 0.058      | 52 (73.2)               | 36 (70.6) | 17 (50.0) | 0.028      |
| Education ≤ 9 years, <i>n</i> (%)                   | 12 (46.2)               | 20 (41.7) | 42 (65.6) | 0.031      | 54 (77.1)               | 34 (66.7) | 26 (76.5) | 0.72       |
| Low physical activity, <i>n</i> (%)                 | 20 (76.9)               | 33 (68.8) | 48 (75.0) | 0.96       | 55 (77.5)               | 40 (78.4) | 26 (76.5) | 0.94       |
| Current smokers, <i>n</i> (%)                       | 1 (4.2)                 | 11 (24.4) | 19 (32.7) | 0.0082     | 6 (8.7)                 | 7 (14.9)  | 11 (34.4) | 0.0018     |
| Alcohol use, <i>n</i> (%)                           | 6 (25.0)                | 14 (31.1) | 28 (48.3) | 0.027      | 22 (31.9)               | 12 (25.5) | 15 (46.9) | 0.24       |
| Obesity, <i>n</i> (%)                               | 7 (26.9)                | 21 (43.8) | 26 (40.6) | 0.34       | 32 (45.1)               | 19 (37.3) | 11 (32.4) | 0.19       |
| Hypertension, <i>n</i> (%)                          | 3 (11.5)                | 8 (16.7)  | 9 (14.1)  | 0.88       | 43 (60.6)               | 32 (62.8) | 12 (35.3) | 0.033      |
| Uncontrolled HT by office measurement, <i>n</i> (%) | 2 (7.7)                 | 7 (14.6)  | 4 (6.3)   | 0.54       | 25 (35.2)               | 16 (31.4) | 6 (17.7)  | 0.081      |
| Uncontrolled HT by ABPM measurement, <i>n</i> (%)   | 3 (17.7)                | 4 (15.4)  | 9 (23.7)  | 0.51       | 18 (33.3)               | 12 (32.4) | 11 (52.4) | 0.19       |
| Pulse wave velocity (m/s) <sup>†</sup>              | 7.1±1.3                 | 7.3±1.2   | 6.9±1.9   | 0.60       | 9.7±2.9                 | 10.9±3.3  | 9.2±2.9   | 0.83       |
| Arterial stiffness, <i>n</i> (%)                    | 0 (0)                   | 0 (0)     | 1 (4.6)   | 0.23       | 22 (40.0)               | 17 (53.1) | 4 (18.2)  | 0.21       |
| Diabetes, <i>n</i> (%)                              | 0 (0)                   | 1 (2.1)   | 1 (1.6)   | 0.67       | 15 (21.1)               | 10 (19.6) | 4 (11.8)  | 0.28       |
| CKD, <i>n</i> (%)                                   | 1 (3.9)                 | 0 (0)     | 2 (3.1)   | 0.89       | 8 (11.3)                | 6 (11.8)  | 4 (12.1)  | 0.89       |
| Nephrolithiasis, <i>n</i> (%)                       | 0 (0)                   | 5 (10.4)  | 6 (9.4)   | 0.22       | 13 (18.3)               | 7 (13.7)  | 6 (17.7)  | 0.82       |
| <b>Prudent DP</b>                                   |                         |           |           |            |                         |           |           |            |
| <i>n</i>                                            | 54                      | 44        | 40        |            | 43                      | 54        | 59        |            |
| Female, <i>n</i> (%)                                | 35 (64.8)               | 33 (75.0) | 26 (65.0) | 0.90       | 27 (62.8)               | 33 (61.1) | 45 (76.3) | 0.12       |
| Education ≤ 9 years, <i>n</i> (%)                   | 30 (55.6)               | 27 (61.4) | 17 (42.5) | 0.25       | 38 (88.4)               | 39 (72.2) | 37 (63.8) | 0.0063     |
| Low physical activity, <i>n</i> (%)                 | 42 (77.8)               | 31 (70.5) | 28 (70.0) | 0.38       | 33 (76.7)               | 44 (81.5) | 44 (74.6) | 0.74       |
| Current smokers, <i>n</i> (%)                       | 11 (20.8)               | 7 (19.4)  | 13 (34.2) | 0.16       | 6 (14.0)                | 10 (19.6) | 8 (14.8)  | 0.95       |
| Alcohol use, <i>n</i> (%)                           | 19 (35.9)               | 14 (38.9) | 15 (39.5) | 0.72       | 12 (27.9)               | 18 (35.3) | 19 (35.2) | 0.47       |

|                                                     |           |           |           |        |           |           |           |        |
|-----------------------------------------------------|-----------|-----------|-----------|--------|-----------|-----------|-----------|--------|
| Obesity, <i>n</i> (%)                               | 22 (40.7) | 21 (47.7) | 11 (27.5) | 0.24   | 15 (34.9) | 27 (50.0) | 20 (33.9) | 0.78   |
| Hypertension, <i>n</i> (%)                          | 6 (11.1)  | 8 (18.2)  | 6 (15.0)  | 0.55   | 22 (51.2) | 33 (61.1) | 32 (54.2) | 0.83   |
| Uncontrolled HT by office measurement, <i>n</i> (%) | 2 (3.7)   | 6 (13.6)  | 5 (12.5)  | 0.12   | 13 (30.2) | 16 (29.6) | 18 (30.5) | 0.97   |
| Uncontrolled HT by ABPM measurement, <i>n</i> (%)   | 4 (12.9)  | 7 (26.9)  | 5 (20.8)  | 0.42   | 12 (46.2) | 12 (29.3) | 17 (37.8) | 0.62   |
| Pulse wave velocity (m/s) <sup>†</sup>              | 6.9±1.5   | 7.4±1.6   | 7.0±1.3   | 0.90   | 8.8±3.4   | 11.1±3.2  | 9.7±2.6   | 0.52   |
| Arterial stiffness, <i>n</i> (%)                    | 0 (0)     | 1 (4.6)   | 0 (0)     | 0.92   | 7 (29.2)  | 21 (61.8) | 15 (29.4) | 0.51   |
| Diabetes, <i>n</i> (%)                              | 2 (3.7)   | 0 (0)     | 0 (0)     | 0.12   | 6 (14.0)  | 11 (20.4) | 12 (20.3) | 0.44   |
| CKD, <i>n</i> (%)                                   | 1 (1.9)   | 1 (2.3)   | 1 (2.5)   | 0.83   | 2 (4.8)   | 10 (18.5) | 6 (10.2)  | 0.53   |
| Nephrolithiasis, <i>n</i> (%)                       | 5 (9.3)   | 3 (6.8)   | 3 (7.5)   | 0.73   | 9 (20.9)  | 9 (16.7)  | 8 (13.6)  | 0.33   |
| <b>Cereal and Mate DP</b>                           |           |           |           |        |           |           |           |        |
| <i>n</i>                                            | 51        | 41        | 46        |        | 47        | 56        | 53        |        |
| Female, <i>n</i> (%)                                | 27 (52.9) | 34 (82.9) | 33 (71.7) | 0.040  | 36 (76.6) | 43 (76.8) | 26 (49.1) | 0.0027 |
| Education ≤ 9 years, <i>n</i> (%)                   | 22 (43.1) | 19 (46.3) | 33 (71.7) | 0.0053 | 30 (65.2) | 47 (83.9) | 37 (69.8) | 0.67   |
| Low physical activity, <i>n</i> (%)                 | 30 (58.8) | 33 (80.5) | 38 (82.6) | 0.0075 | 34 (72.3) | 46 (82.1) | 41 (77.4) | 0.57   |
| Current smokers, <i>n</i> (%)                       | 9 (18.4)  | 9 (23.1)  | 13 (33.3) | 0.11   | 2 (4.7)   | 10 (18.9) | 12 (23.1) | 0.017  |
| Alcohol use, <i>n</i> (%)                           | 17 (34.0) | 12 (31.6) | 19 (48.7) | 0.18   | 12 (27.9) | 13 (24.5) | 24 (46.2) | 0.049  |
| Obesity, <i>n</i> (%)                               | 20 (39.2) | 15 (36.6) | 19 (41.3) | 0.84   | 19 (40.4) | 25 (44.6) | 18 (34.0) | 0.49   |
| Hypertension, <i>n</i> (%)                          | 9 (17.6)  | 5 (12.2)  | 6 (13.0)  | 0.51   | 23 (48.9) | 35 (62.5) | 29 (54.7) | 0.59   |
| Uncontrolled HT by office measurement, <i>n</i> (%) | 7 (13.7)  | 2 (4.9)   | 4 (8.7)   | 0.38   | 11 (23.4) | 20 (35.7) | 16 (30.2) | 0.49   |
| Uncontrolled HT by ABPM measurement, <i>n</i> (%)   | 3 (12.0)  | 8 (30.8)  | 5 (16.7)  | 0.73   | 12 (37.5) | 12 (30)   | 17 (42.5) | 0.61   |
| Pulse wave velocity (m/s) <sup>†</sup>              | 7.1±1.4   | 7.0±1.7   | 7.3±1.3   | 0.65   | 9.6±3.0   | 10.1±2.7  | 10.1±3.4  | 0.48   |
| Arterial stiffness, <i>n</i> (%)                    | 0 (0)     | 1 (4.6)   | 0 (0)     | 0.98   | 11 (36.7) | 17 (46.0) | 15 (35.7) | 0.86   |
| Diabetes, <i>n</i> (%)                              | 0 (0)     | 0 (0)     | 2 (4.4)   | 0.078  | 9 (19.2)  | 11 (19.6) | 9 (17.0)  | 0.77   |
| CKD, <i>n</i> (%)                                   | 0 (0)     | 1 (2.4)   | 2 (4.4)   | 0.14   | 4 (8.7)   | 9 (16.1)  | 5 (9.4)   | 0.95   |
| Nephrolithiasis, <i>n</i> (%)                       | 5 (9.8)   | 4 (9.8)   | 2 (4.4)   | 0.33   | 8 (17.0)  | 10 (17.9) | 8 (15.1)  | 0.79   |

\**p*-Value for trend <sup>†</sup>Mean values±SD. HT: hypertension; ABPM ambulatory blood pressure monitoring (*n*=193); CKD Chronic Kidney Disease.

Low physical activity was defined as energy expenditure < 600kcal/min per week. Current smokers (yes/no). Alcohol use was considered if reported drinking alcohol at least once a week (yes/no). Obesity was defined as BMI ≥30 kg/m<sup>2</sup>. Hypertension was defined as blood pressure (BP) of at least 140 mm Hg systolic or 90 mm Hg diastolic.

diastolic or use of antihypertensive drugs. Uncontrolled hypertension was defined by office BP of at least 140 mm Hg systolic or 90 mm Hg diastolic. Uncontrolled hypertension by ABPM was defined as BP of at least 130 mm Hg systolic or 80 mm Hg diastolic. Pulse wave velocity was the distance in meters divided by the transit time in seconds ( $n=174$ ). Arterial stiffness was defined as a pulse wave velocity  $> 10$  m/s. Diabetes was defined as self-reported diagnosis, a fasting plasma glucose of 126 mg/dl or higher, or use of antidiabetic drugs. CKD was defined as an eGFR  $< 60$  mL/min/1.73m<sup>2</sup> or an albumin/creatinine ratio  $> 30$  mg/g, based on a single determination ( $n=155$ ). Nephrolithiasis was defined according to report (yes/no).

**Table S4.** Median metabolic, anthropometric, cardiovascular and renal variables according to tertiles (T) of dietary pattern and age categories in Uruguayan adults.

|                                                 | Age ≤ 54 years<br>N=138 |        |        |            | Age > 54 years<br>N=156 |          |         |            |
|-------------------------------------------------|-------------------------|--------|--------|------------|-------------------------|----------|---------|------------|
|                                                 | T1                      | T2     | T3     | <i>p</i> * | T1                      | T2       | T3      | <i>p</i> * |
| <b>Meat DP</b>                                  |                         |        |        |            |                         |          |         |            |
| <i>Metabolic characteristics</i>                |                         |        |        |            |                         |          |         |            |
| Fasting glucose (mg/dl)                         | 87.6                    | 86.1   | 88.7   |            | 98.7                    | 99.6     | 107.0   |            |
| Adjusted median difference                      | Ref                     | -0.27  | -0.72  | 0.63       | Ref                     | 0.71     | 2.13    | 0.64       |
| Total cholesterol (mg/dl)                       | 202.2                   | 200.6  | 196.1  |            | 214.8                   | 211.4    | 198.6   |            |
| Adjusted median difference                      | Ref                     | -0.67  | -1.77  | 0.72       | Ref                     | -2.52    | -7.53   | 0.24       |
| Triglyceride (mg/dl)                            | 115.4                   | 119.8  | 145.6  |            | 154.0                   | 145.0    | 159.7   |            |
| Adjusted median difference                      | Ref                     | 8.43   | 22.19  | 0.036      | Ref                     | 1.97     | 5.88    | 0.60       |
| LDLc (mg/dl)                                    | 121.8                   | 122.5  | 116.9  |            | 134.1                   | 131.3    | 127.4   |            |
| Adjusted median difference                      | Ref                     | -0.87  | -2.29  | 0.60       | Ref                     | -1.30    | -3.89   | 0.44       |
| HDLc (mg/dl)                                    | 53.2                    | 55.1   | 47.7   |            | 47.1                    | 48.5     | 44.4    |            |
| Adjusted median difference                      | Ref                     | -1.37  | -3.61  | 0.047      | Ref                     | -1.06    | -3.16   | 0.087      |
| Non-HDL cholesterol (mg/dl)                     | 147.1                   | 145.2  | 146.3  |            | 167.5                   | 162.2    | 156.9   |            |
| Adjusted median difference                      | Ref                     | 0.19   | 0.51   | 0.92       | Ref                     | -1.38    | -4.13   | 0.50       |
| TG/HDLc ratio                                   | 2.53                    | 2.50   | 3.42   |            | 3.67                    | 3.53     | 4.08    |            |
| Adjusted median difference                      | Ref                     | 0.33   | 0.88   | 0.0038     | Ref                     | 0.11     | 0.31    | 0.33       |
| HOMA-r                                          | 2.33                    | 2.52   | 3.10   |            | 3.11                    | 3.25     | 4.04    |            |
| Adjusted median difference                      | Ref                     | 0.15   | 0.40   | 0.15       | Ref                     | 0.19     | 0.55    | 0.17       |
| Neutrophils/Lymphocytes ratio                   | 1.86                    | 1.83   | 1.89   |            | 1.89                    | 1.93     | 1.82    |            |
| Adjusted median difference                      | Ref                     | 0.033  | 0.086  | 0.48       | Ref                     | 0.048    | 0.14    | 0.18       |
| Serum 25(OH)D (ng/ml)                           | 23.2                    | 22.7   | 25.4   |            | 28.8                    | 25.6     | 25.5    |            |
| Adjusted median difference                      | Ref                     | 0.39   | 1.01   | 0.42       | Ref                     | -0.98    | -2.94   | 0.012      |
| <i>Anthropometric characteristics</i>           |                         |        |        |            |                         |          |         |            |
| BMI (kg/m <sup>2</sup> )                        | 25.2                    | 28.6   | 28.3   |            | 28.2                    | 27.8     | 27.6    |            |
| Adjusted median difference                      | Ref                     | 0.35   | 0.93   | 0.37       | Ref                     | 0.016    | 0.049   | 0.94       |
| Waist/height ratio                              | 0.56                    | 0.57   | 0.57   |            | 0.60                    | 0.60     | 0.59    |            |
| Adjusted median difference                      | Ref                     | 0.0031 | 0.0083 | 0.31       | Ref                     | -0.00093 | -0.0028 | 0.63       |
| <i>Cardiovascular and renal characteristics</i> |                         |        |        |            |                         |          |         |            |
| Systolic office BP (mm Hg)                      | 120.6                   | 124.7  | 123.3  |            | 127.5                   | 127.1    | 123.6   |            |
| Adjusted median difference                      | Ref                     | -0.68  | -1.79  | 0.33       | Ref                     | -0.74    | -2.21   | 0.35       |
| Diastolic office BP (mm Hg)                     | 77.2                    | 83.0   | 79.1   |            | 83.5                    | 81.6     | 80.6    |            |
| Adjusted median difference                      | Ref                     | -0.30  | -0.78  | 0.52       | Ref                     | -0.42    | -1.26   | 0.34       |
| Systolic ABPM (mm Hg)                           | 118.4                   | 120.6  | 122.3  |            | 121.0                   | 125.2    | 123.8   |            |
| Adjusted median difference                      | Ref                     | 0.27   | 0.75   | 0.78       | Ref                     | 0.70     | 2.10    | 0.34       |
| Diastolic ABPM (mm Hg)                          | 75.3                    | 76.3   | 76.6   |            | 76.5                    | 77.5     | 79.9    |            |
| Adjusted median difference                      | Ref                     | 0.042  | 0.12   | 0.96       | Ref                     | 0.74     | 2.20    | 0.19       |
| Pulse wave velocity (m/s)                       | 7.6                     | 7.7    | 7.1    |            | 9.0                     | 10.2     | 9.2     |            |
| Adjusted median difference                      | Ref                     | -0.26  | -0.67  | 0.055      | Ref                     | 0.084    | 0.22    | 0.68       |
| Serum creatinine (mg/dl)                        | 0.76                    | 0.76   | 0.78   |            | 0.87                    | 0.85     | 0.88    |            |
| Adjusted median difference                      | Ref                     | 0.0014 | 0.0036 | 0.84       | Ref                     | -0.0087  | -0.026  | 0.39       |
| Proteinuria (g/24-h)                            | 0.13                    | 0.12   | 0.16   |            | 0.16                    | 0.12     | 0.18    |            |
| Adjusted median difference                      | Ref                     | 0.014  | 0.038  | 0.0070     | Ref                     | -0.0022  | -0.0066 | 0.81       |
| Albumin/creatinine ratio (mg/g)                 | 5.1                     | 1.3    | 6.1    |            | 28.7                    | 19.1     | 28.5    |            |

|                                                 |       |          |         |        |       |         |         |       |
|-------------------------------------------------|-------|----------|---------|--------|-------|---------|---------|-------|
| Adjusted median difference                      | Ref   | 0.82     | 2.16    | 0.49   | Ref   | -0.89   | -2.64   | 0.73  |
| eGFR (mL/min/1.73 m <sup>2</sup> )              | 108.7 | 109.1    | 110.4   |        | 82.9  | 83.8    | 85.4    |       |
| Adjusted median difference                      | Ref   | 0.96     | 2.52    | 0.25   | Ref   | 1.31    | 3.92    | 0.099 |
| <b>Prudent DP</b>                               |       |          |         |        |       |         |         |       |
| <i>Metabolic characteristics</i>                |       |          |         |        |       |         |         |       |
| Fasting glucose (mg/dl)                         | 86.2  | 85.3     | 90.5    |        | 98.0  | 95.5    | 110.9   |       |
| Adjusted median difference                      | Ref   | 0.96     | 2.77    | 0.084  | Ref   | 2.63    | 6.19    | 0.23  |
| Total cholesterol (mg/dl)                       | 192.7 | 198.3    | 204.1   |        | 213.4 | 198.4   | 207.1   |       |
| Adjusted median difference                      | Ref   | 2.70     | 7.78    | 0.13   | Ref   | 1.93    | 4.54    | 0.54  |
| Triglyceride (mg/dl)                            | 129.4 | 139.9    | 131.0   |        | 139.7 | 168.0   | 142.7   |       |
| Adjusted median difference                      | Ref   | 1.69     | 4.87    | 0.67   | Ref   | -3.22   | -7.60   | 0.55  |
| LDLc (mg/dl)                                    | 115.7 | 117.0    | 125.2   |        | 121.7 | 133.1   | 133.0   |       |
| Adjusted median difference                      | Ref   | 2.22     | 6.39    | 0.17   | Ref   | 3.06    | 7.20    | 0.22  |
| HDLc (mg/dl)                                    | 51.4  | 49.4     | 52.1    |        | 50.7  | 45.1    | 46.3    |       |
| Adjusted median difference                      | Ref   | 0.091    | 2.62    | 0.89   | Ref   | -0.59   | -1.40   | 0.51  |
| Non-HDL cholesterol (mg/dl)                     | 140.1 | 144.5    | 152.7   |        | 148.2 | 169.6   | 160.7   |       |
| Adjusted median difference                      | Ref   | 2.93     | 8.44    | 0.10   | Ref   | 2.28    | 3.37    | 0.44  |
| TG/HDLc ratio                                   | 2.87  | 3.25     | 2.89    |        | 3.25  | 4.14    | 3.60    |       |
| Adjusted median difference                      | Ref   | 0.025    | 0.073   | 0.83   | Ref   | -0.054  | -0.13   | 0.74  |
| HOMA-r                                          | 2.67  | 2.33     | 3.27    |        | 2.52  | 3.30    | 4.16    |       |
| Adjusted median difference                      | Ref   | 0.13     | 0.38    | 0.21   | Ref   | 0.26    | 0.62    | 0.18  |
| Neutrophils/Lymphocytes ratio                   | 1.92  | 2.00     | 1.71    |        | 1.75  | 1.91    | 1.90    |       |
| Adjusted median difference                      | Ref   | -0.034   | -0.099  | 0.45   | Ref   | 0.053   | 0.13    | 0.31  |
| Serum 25(OH)D (ng/ml)                           | 23.3  | 21.9     | 26.1    |        | 28.4  | 25.2    | 27.2    |       |
| Adjusted median difference                      | Ref   | 0.71     | 2.05    | 0.12   | Ref   | 0.096   | 0.23    | 0.87  |
| <i>Anthropometric characteristics</i>           |       |          |         |        |       |         |         |       |
| BMI (kg/m <sup>2</sup> )                        | 28.3  | 29.4     | 27.2    |        | 25.8  | 29.2    | 27.9    |       |
| Adjusted median difference                      | Ref   | -0.16    | -0.47   | 0.68   | Ref   | 0.61    | 1.44    | 0.070 |
| Waist/height ratio                              | 0.57  | 0.58     | 0.56    |        | 0.60  | 0.60    | 0.60    |       |
| Adjusted median difference                      | Ref   | -0.00058 | -0.0017 | 0.85   | Ref   | -0.0039 | -0.0093 | 0.16  |
| <i>Cardiovascular and renal characteristics</i> |       |          |         |        |       |         |         |       |
| Systolic office BP (mm Hg)                      | 123.4 | 122.3    | 124.3   |        | 122.8 | 127.0   | 126.8   |       |
| Adjusted median difference                      | Ref   | -0.053   | -0.15   | 0.94   | Ref   | 0.54    | 1.28    | 0.64  |
| Diastolic office BP (mm Hg)                     | 79.1  | 79.8     | 81.4    |        | 80.3  | 81.0    | 83.8    |       |
| Adjusted median difference                      | Ref   | 0.45     | 1.31    | 0.32   | Ref   | 0.45    | 1.07    | 0.49  |
| Systolic ABPM (mm Hg)                           | 121.4 | 123.9    | 119.9   |        | 125.5 | 123.2   | 122.2   |       |
| Adjusted median difference                      | Ref   | -0.32    | -0.88   | 0.77   | Ref   | -0.84   | -2.31   | 0.29  |
| Diastolic ABPM (mm Hg)                          | 75.5  | 79.0     | 75.8    |        | 78.3  | 77.3    | 78.1    |       |
| Adjusted median difference                      | Ref   | 0.21     | 0.59    | 0.80   | Ref   | -0.12   | -0.33   | 0.84  |
| Pulse wave velocity (m/s)                       | 7.1   | 7.6      | 7.4     |        | 8.1   | 10.0    | 9.4     |       |
| Adjusted median difference                      | Ref   | -0.013   | -0.039  | 0.90   | Ref   | 0.11    | 0.25    | 0.66  |
| Serum creatinine (mg/dl)                        | 0.74  | 0.78     | 0.80    |        | 0.85  | 0.89    | 0.85    |       |
| Adjusted median difference                      | Ref   | 0.020    | 0.057   | 0.0027 | Ref   | -0.0069 | -0.016  | 0.64  |
| Proteinuria (g/24-h)                            | 0.15  | 0.14     | 0.14    |        | 0.15  | 0.17    | 0.13    |       |
| Adjusted median difference                      | Ref   | -0.0030  | -0.0087 | 0.54   | Ref   | -0.0066 | -0.016  | 0.58  |
| Albumin/creatinine ratio (mg/g)                 | 4.60  | 4.60     | 4.07    |        | 20.4  | 22.8    | 33.3    |       |
| Adjusted median difference                      | Ref   | -0.056   | -0.16   | 0.96   | Ref   | 1.79    | 4.28    | 0.71  |
| eGFR (mL/min/1.73 m <sup>2</sup> )              | 114.2 | 107.7    | 106.8   |        | 85.5  | 82.1    | 85.5    |       |
| Adjusted median difference                      | Ref   | -2.39    | -6.88   | 0.0031 | Ref   | 0.70    | 1.64    | 0.55  |



| Cereal and Mate DP                       |       |        |        |        |       |        |        |      |
|------------------------------------------|-------|--------|--------|--------|-------|--------|--------|------|
| Metabolic characteristics                |       |        |        |        |       |        |        |      |
| Fasting glucose (mg/dl)                  | 88.2  | 86.1   | 87.7   |        | 98.5  | 103.2  | 102.5  |      |
| Adjusted median difference               | Ref   | -0.60  | -1.65  | 0.37   | Ref   | 1.08   | 2.50   | 0.66 |
| Total cholesterol (mg/dl)                | 199.6 | 197.8  | 197.1  |        | 208.5 | 204.8  | 209.9  |      |
| Adjusted median difference               | Ref   | -1.60  | -4.36  | 0.46   | Ref   | 4.14   | 9.59   | 0.23 |
| Triglyceride (mg/dl)                     | 135.1 | 132.1  | 129.7  |        | 174.3 | 137.9  | 152.5  |      |
| Adjusted median difference               | Ref   | 2.13   | 5.80   | 0.66   | Ref   | -0.32  | -0.74  | 0.96 |
| LDLc (mg/dl)                             | 118.8 | 121.7  | 116.6  |        | 126.0 | 128.5  | 134.3  |      |
| Adjusted median difference               | Ref   | -2.91  | -7.95  | 0.13   | Ref   | 4.45   | 10.29  | 0.10 |
| HDLc (mg/dl)                             | 48.6  | 50.7   | 55.6   |        | 46.9  | 47.9   | 45.9   |      |
| Adjusted median difference               | Ref   | 1.83   | 5.01   | 0.024  | Ref   | -0.27  | -0.62  | 0.79 |
| Non-HDL colessterol (mg/dl)              | 150.1 | 142.5  | 142.1  |        | 159.9 | 158.8  | 164.8  |      |
| Adjusted median difference               | Ref   | -2.95  | -8.05  | 0.17   | Ref   | 4.82   | 11.5   | 0.14 |
| TG/HDLc ratio                            | 3.16  | 3.00   | 2.68   |        | 4.22  | 3.39   | 3.78   |      |
| Adjusted median difference               | Ref   | -0.071 | -0.19  | 0.61   | Ref   | -0.020 | -0.047 | 0.91 |
| HOMA-r                                   | 2.80  | 2.85   | 2.77   |        | 3.21  | 3.85   | 3.37   |      |
| Adjusted median difference               | Ref   | -0.055 | -0.15  | 0.66   | Ref   | 0.074  | 0.17   | 0.74 |
| Neutrophils/Lymphocytes ratio            | 1.67  | 2.01   | 2.05   |        | 2.01  | 1.96   | 1.77   |      |
| Adjusted median difference               | Ref   | 0.11   | 0.29   | 0.051  | Ref   | -0.027 | -0.062 | 0.65 |
| Serum 25(OH)D (ng/ml)                    | 24.2  | 23.7   | 24.0   |        | 25.6  | 29.1   | 25.5   |      |
| Adjusted median difference               | Ref   | 0.31   | 0.84   | 0.60   | Ref   | 0.19   | 0.45   | 0.76 |
| Anthropometric characteristics           |       |        |        |        |       |        |        |      |
| BMI (kg/m²)                              | 28.3  | 28.3   | 27.9   |        | 27.6  | 27.3   | 28.4   |      |
| Adjusted median difference               | Ref   | -0.093 | -0.25  | 0.84   | Ref   | 0.14   | 0.33   | 0.71 |
| Waist/height ratio                       | 0.57  | 0.55   | 0.57   |        | 0.60  | 0.60   | 0.60   |      |
| Adjusted median difference               | Ref   | 0.0021 | 0.0058 | 0.56   | Ref   | 0.0014 | 0.0033 | 0.65 |
| Cardiovascular and renal characteristics |       |        |        |        |       |        |        |      |
| Systolic office BP (mm Hg)               | 123.0 | 121.5  | 126.0  |        | 124.6 | 125.4  | 127.1  |      |
| Adjusted median difference               | Ref   | 1.87   | 5.09   | 0.022  | Ref   | 1.42   | 3.28   | 0.27 |
| Diastolic office BP (mm Hg)              | 80.4  | 78.8   | 81.2   |        | 81.3  | 82.4   | 81.8   |      |
| Adjusted median difference               | Ref   | 0.46   | 1.25   | 0.40   | Ref   | 0.37   | 0.86   | 0.61 |
| Systolic ABPM (mm Hg)                    | 119.0 | 120.8  | 125.3  |        | 124.8 | 121.0  | 123.5  |      |
| Adjusted median difference               | Ref   | 3.88   | 10.74  | 0.0004 | Ref   | -0.092 | -0.18  | 0.94 |
| Diastolic ABPM (mm Hg)                   | 74.6  | 76.8   | 79.2   |        | 78.7  | 75.4   | 78.3   |      |
| Adjusted median difference               | Ref   | 2.46   | 6.82   | 0.0046 | Ref   | 0.60   | 1.20   | 0.49 |
| Pulse wave velocity (m/s)                | 7.31  | 7.21   | 7.71   |        | 8.9   | 9.2    | 9.7    |      |
| Adjusted median difference               | Ref   | 0.14   | 0.40   | 0.32   | Ref   | 0.13   | 0.37   | 0.55 |
| Serum creatinine (mg/dl)                 | 0.77  | 0.76   | 0.78   |        | 0.87  | 0.85   | 0.88   |      |
| Adjusted median difference               | Ref   | 0.0026 | 0.0070 | 0.75   | Ref   | 0.0013 | 0.0031 | 0.93 |
| Proteinuria (g/24-h)                     | 0.14  | 0.14   | 0.15   |        | 0.16  | 0.18   | 0.13   |      |
| Adjusted median difference               | Ref   | 0.0056 | 0.015  | 0.35   | Ref   | -0.012 | -0.028 | 0.33 |
| Albumin/creatinine ratio (mg/g)          | 1.53  | 0.79   | 11.05  |        | 32.3  | 22.2   | 24.7   |      |
| Adjusted median difference               | Ref   | 4.19   | 11.44  | 0.0005 | Ref   | -6.74  | -15.4  | 0.18 |
| eGFR (mL/min/1.73 m²)                    | 108.9 | 112.2  | 108.9  |        | 83.4  | 85.7   | 83.4   |      |
| Adjusted median difference               | Ref   | 0.15   | 0.40   | 0.88   | Ref   | 0.22   | 0.50   | 0.87 |

\**p*-Value for linear trend. Ref: reference value. LDLc low-density lipoproteins cholesterol; HDLc high-density lipoproteins cholesterol; TG/HDLc triglycerides/high-density lipoproteins cholesterol ratio; HOMA-r Homeostasis Model Assessment of Insulin Resistance; 25(OH)D 25-hydroxy-vitamin-D; BMI body mass index; BP blood pressure; ABPM ambulatory blood pressure monitoring (*n* =193); eGFR estimated glomerular filtration rate, derived

from the Chronic Kidney Disease Epidemiology Collaboration equation. Pulse wave velocity ( $n = 174$ ), and albumin/creatinine ( $n = 155$ ). Multivariable models were adjusted for continuous variables: BMI, daily energy intake and for categorical variables: sex, smoking status (current smoking: yes/no), physical activity (inactive < 600 mets/min per week, active  $\geq$  600 mets/min per week) and education ( $\leq$  9 years, > 9 years). For 25(OH)D models were additionally adjusted for season (summer, autumn, winter, spring), and for blood pressure for use of antihypertensive drugs (yes/no).

**Table S5.** General adjusted Odds Ratio (OR), 95% confidence intervals (CI) for continuous variables according to tertiles (T) of dietary pattern in Uruguayan adults.

| Variables                                              | Meat DP |      |           |      |           | Prudent DP |      |           |      |           | Cereal and Mate DP |      |           |      |           |
|--------------------------------------------------------|---------|------|-----------|------|-----------|------------|------|-----------|------|-----------|--------------------|------|-----------|------|-----------|
|                                                        | T1      | T2   |           | T3   |           | T1         | T2   |           | T3   |           | T1                 | T2   |           | T3   |           |
|                                                        | Ref     | OR   | 95% CI    | OR   | 95% CI    | Ref        | OR   | 95% CI    | OR   | 95% CI    | Ref                | OR   | 95% CI    | OR   | 95% CI    |
| Systolic blood pressure by office measurement (mm Hg)  |         |      |           |      |           |            |      |           |      |           |                    |      |           |      |           |
| Adjusted                                               | 1.00    | 1.04 | 0.62-1.75 | 1.10 | 0.61-2.00 | 1.00       | 0.95 | 0.57-1.59 | 1.11 | 0.67-1.84 | 1.00               | 0.91 | 0.54-1.51 | 1.06 | 0.62-1.82 |
| Diastolic blood pressure by office measurement (mm Hg) |         |      |           |      |           |            |      |           |      |           |                    |      |           |      |           |
| Adjusted                                               | 1.00    | 1.25 | 0.75-2.11 | 0.94 | 0.52-1.70 | 1.00       | 0.94 | 0.55-1.57 | 1.53 | 0.92-2.55 | 1.00               | 1.09 | 0.66-1.82 | 1.13 | 0.66-1.94 |
| Systolic blood pressure by ABPM measurement (mm Hg)    |         |      |           |      |           |            |      |           |      |           |                    |      |           |      |           |
| Adjusted                                               | 1.00    | 1.58 | 0.85-2.93 | 1.64 | 0.79-3.41 | 1.00       | 1.08 | 0.56-2.08 | 0.76 | 0.40-1.43 | 1.00               | 0.74 | 0.39-1.41 | 0.84 | 0.44-1.62 |
| Diastolic blood pressure by ABPM measurement (mm Hg)   |         |      |           |      |           |            |      |           |      |           |                    |      |           |      |           |
| Adjusted                                               | 1.00    | 1.14 | 0.61-2.12 | 1.51 | 0.73-3.13 | 1.00       | 0.99 | 0.51-1.90 | 1.06 | 0.56-2.01 | 1.00               | 0.89 | 0.47-1.70 | 1.02 | 0.53-1.95 |
| Pulse wave velocity (m/s)                              |         |      |           |      |           |            |      |           |      |           |                    |      |           |      |           |
| Adjusted                                               | 1.00    | 1.88 | 0.97-3.66 | 1.27 | 0.59-2.73 | 1.00       | 2.04 | 0.98-4.23 | 1.32 | 0.67-2.62 | 1.00               | 1.01 | 0.51-1.99 | 1.26 | 0.61-2.63 |
| TG/HDLc ratio                                          |         |      |           |      |           |            |      |           |      |           |                    |      |           |      |           |
| Adjusted                                               | 1.00    | 0.76 | 0.45-1.27 | 1.53 | 0.85-2.78 | 1.00       | 1.58 | 0.94-2.65 | 1.22 | 0.73-2.04 | 1.00               | 0.71 | 0.43-1.19 | 0.81 | 0.47-1.39 |
| Body mass index (kg/m <sup>2</sup> )                   |         |      |           |      |           |            |      |           |      |           |                    |      |           |      |           |
| Adjusted                                               | 1.00    | 1.34 | 0.80-2.26 | 1.25 | 0.69-2.26 | 1.00       | 2.03 | 1.21-3.41 | 1.15 | 0.69-1.91 | 1.00               | 1.11 | 0.66-1.85 | 1.23 | 0.72-2.11 |
| Waist-to-height ratio                                  |         |      |           |      |           |            |      |           |      |           |                    |      |           |      |           |
| Adjusted                                               | 1.00    | 1.18 | 0.70-2.00 | 1.38 | 0.76-2.51 | 1.00       | 0.99 | 0.59-1.68 | 0.80 | 0.48-1.34 | 1.00               | 0.71 | 0.42-1.19 | 0.99 | 0.58-1.72 |
| Serum 25(OH)D (ng/ml)                                  |         |      |           |      |           |            |      |           |      |           |                    |      |           |      |           |
| Adjusted                                               | 1.00    | 0.63 | 0.37-1.07 | 1.06 | 0.58-1.93 | 1.00       | 0.90 | 0.53-1.51 | 1.13 | 0.68-1.88 | 1.00               | 1.73 | 1.03-2.91 | 1.14 | 0.65-1.99 |
| eGFR (mL/min/1.73m <sup>2</sup> )                      |         |      |           |      |           |            |      |           |      |           |                    |      |           |      |           |
| Adjusted                                               | 1.00    | 0.86 | 0.51-1.44 | 0.48 | 0.27-0.88 | 1.00       | 0.70 | 0.42-1.17 | 0.86 | 0.52-1.43 | 1.00               | 1.23 | 0.74-2.06 | 1.05 | 0.61-1.80 |

Total  $n=294$ . Ref: reference values. ABPM ambulatory blood pressure monitoring ( $n=193$ ); TG triglycerides; HDLc high-density lipoproteins cholesterol; 25(OH)D 25-Hydroxy-Vitamin-D. eGFR estimated glomerular filtration rate. Pulse wave velocity ( $n=174$ ). Models adjusted for continuous variables: age, body mass index, daily energy intake and categorical variables: sex, smoking status (current smoking: yes/no), physical activity (inactive < 600 mets/min per week, active  $\geq$  600 mets/min per week) and education ( $\leq$  9 years, > 9 years). For 25(OH)D they were additionally adjusted for season (summer, autumn, winter, spring), and for BP for use of antihypertensive drugs (yes/no).

**Table S6.** General adjusted Odds ratio (OR) and 95% confidence intervals (CI) for cardiovascular and renal risk phenotypes according to tertiles (T) of dietary pattern and age categories in Uruguayan adults.

| Age ≤ 54 y                                                                         |         |      |            |      |            |            |      |            |      |            |                    |      |            |      |            |
|------------------------------------------------------------------------------------|---------|------|------------|------|------------|------------|------|------------|------|------------|--------------------|------|------------|------|------------|
| Variables                                                                          | Meat DP |      |            |      |            | Prudent DP |      |            |      |            | Cereal and Mate DP |      |            |      |            |
|                                                                                    | T1      | T2   |            | T3   |            | T1         | T2   |            | T3   |            | T1                 | T2   |            | T3   |            |
|                                                                                    | Ref     | OR   | 95% CI     | OR   | 95% CI     | Ref        | OR   | 95% CI     | OR   | 95% CI     | Ref                | OR   | 95% CI     | OR   | 95% CI     |
| Uncontrolled hypertension by office measurement (SBP ≥140 mm Hg or DBP ≥ 90 mm Hg) |         |      |            |      |            |            |      |            |      |            |                    |      |            |      |            |
| Adjusted                                                                           | 1.00    | 2.38 | 0.30-18.34 | 0.38 | 0.031-4.50 | 1.00       | 2.70 | 0.34-21.32 | 3.59 | 0.43-30.14 | 1.00               | 0.14 | 0.011-1.84 | 0.85 | 0.13-5.65  |
| Uncontrolled hypertension by ABPM measurement (SBP ≥130 mm Hg or DBP ≥ 80 mm Hg)   |         |      |            |      |            |            |      |            |      |            |                    |      |            |      |            |
| Adjusted                                                                           | 1.00    | 0.36 | 0.050-2.55 | 1.68 | 0.26-10.75 | 1.00       | 2.41 | 0.51-11.48 | 1.11 | 0.20-6.19  | 1.00               | 6.73 | 1.04-43.60 | 2.11 | 0.34-13.19 |
| High TG/HDLc ratio (>3.75 for men and >3.0 for women)                              |         |      |            |      |            |            |      |            |      |            |                    |      |            |      |            |
| Adjusted                                                                           | 1.00    | 1.38 | 0.35-5.44  | 2.90 | 0.75-11.12 | 1.00       | 0.93 | 0.35-2.49  | 0.70 | 0.25-2.00  | 1.00               | 0.81 | 0.29-2.32  | 0.60 | 0.19-1.86  |
| Overweight (BMI ≥ 25 < 30 kg/m²)                                                   |         |      |            |      |            |            |      |            |      |            |                    |      |            |      |            |
| Adjusted                                                                           | 1.00    | 0.73 | 0.25-2.20  | 0.51 | 0.16-1.59  | 1.00       | 0.90 | 0.34-2.39  | 1.29 | 0.51-2.27  | 1.00               | 2.87 | 1.04-7.89  | 2.36 | 0.79-7.09  |
| Overweight and Obesity (BMI ≥25 kg/m²)                                             |         |      |            |      |            |            |      |            |      |            |                    |      |            |      |            |
| Adjusted                                                                           | 1.00    | 2.13 | 0.63-7.23  | 1.30 | 0.39-4.36  | 1.00       | 1.51 | 0.51-4.46  | 0.71 | 0.27-1.91  | 1.00               | 2.84 | 0.97-8.28  | 2.29 | 0.77-6.87  |
| High waist-to-height ratio (≥0.5)                                                  |         |      |            |      |            |            |      |            |      |            |                    |      |            |      |            |
| Adjusted                                                                           | 1.00    | 0.38 | 0.053-2.69 | 1.30 | 0.16-10.24 | 1.00       | 0.61 | 0.10-3.71  | 0.55 | 0.10-2.89  | 1.00               | 0.41 | 0.074-2.25 | 2.69 | 0.32-22.81 |

  

| Age > 54 y                                                                         |         |      |           |      |            |            |      |            |      |           |                    |      |           |      |           |
|------------------------------------------------------------------------------------|---------|------|-----------|------|------------|------------|------|------------|------|-----------|--------------------|------|-----------|------|-----------|
| Variables                                                                          | Meat DP |      |           |      |            | Prudent DP |      |            |      |           | Cereal and Mate DP |      |           |      |           |
|                                                                                    | T1      | T2   |           | T3   |            | T1         | T2   |            | T3   |           | T1                 | T2   |           | T3   |           |
|                                                                                    | Ref     | OR   | 95% CI    | OR   | 95% CI     | Ref        | OR   | 95% CI     | OR   | 95% CI    | Ref                | OR   | 95% CI    | OR   | 95% CI    |
| Uncontrolled hypertension by office measurement (SBP ≥140 mm Hg or DBP ≥ 90 mm Hg) |         |      |           |      |            |            |      |            |      |           |                    |      |           |      |           |
| Adjusted                                                                           | 1.00    | 0.99 | 0.44-2.23 | 0.48 | 0.15-1.54  | 1.00       | 0.96 | 0.36-2.51  | 1.21 | 0.47-3.06 | 1.00               | 1.99 | 0.78-5.09 | 1.29 | 0.48-3.49 |
| Uncontrolled hypertension by ABPM measurement (SBP ≥130 mm Hg or DBP ≥ 80 mm Hg)   |         |      |           |      |            |            |      |            |      |           |                    |      |           |      |           |
| Adjusted                                                                           | 1.00    | 0.95 | 0.41-2.18 | 1.83 | 0.69-4.82  | 1.00       | 0.81 | 0.33-1.97  | 1.01 | 0.43-2.35 | 1.00               | 1.26 | 0.53-3.01 | 0.95 | 0.40-2.28 |
| Arterial stiffness (pulse wave velocity > 10 m/s)                                  |         |      |           |      |            |            |      |            |      |           |                    |      |           |      |           |
| Adjusted                                                                           | 1.00    | 2.86 | 0.84-9.80 | 2.14 | 0.46-10.00 | 1.00       | 4.05 | 0.97-16.93 | 1.76 | 0.49-6.34 | 1.00               | 0.95 | 0.28-3.27 | 0.55 | 0.14-2.26 |
| High TG/HDLc ratio (>3.75 for men and >3.0 for women)                              |         |      |           |      |            |            |      |            |      |           |                    |      |           |      |           |
| Adjusted                                                                           | 1.00    | 0.94 | 0.41-2.13 | 0.44 | 0.14-1.37  | 1.00       | 2.34 | 0.90-6.12  | 1.00 | 0.38-2.64 | 1.00               | 0.39 | 0.15-0.99 | 0.74 | 0.29-1.92 |

|                                                                                   |      |      |            |      |            |      |      |            |       |            |      |      |            |      |            |
|-----------------------------------------------------------------------------------|------|------|------------|------|------------|------|------|------------|-------|------------|------|------|------------|------|------------|
| Overweight (BMI $\geq 25 < 30$ kg/m <sup>2</sup> )                                |      |      |            |      |            |      |      |            |       |            |      |      |            |      |            |
| Adjusted                                                                          | 1.00 | 1.71 | 0.78-3.77  | 1.25 | 0.46-3.40  | 1.00 | 1.42 | 0.59-3.46  | 1.57  | 0.65-3.78  | 1.00 | 1.57 | 0.64-3.86  | 2.84 | 1.11-7.27  |
| Overweight and Obesity (BMI $>25$ kg/m <sup>2</sup> )                             |      |      |            |      |            |      |      |            |       |            |      |      |            |      |            |
| Adjusted                                                                          | 1.00 | 1.56 | 0.55-4.42  | 0.59 | 0.15-2.36  | 1.00 | 10.9 | 2.6-46.2   | 2.44  | 0.79-7.51  | 1.00 | 1.70 | 0.57-5.05  | 2.76 | 0.80-9.50  |
| High waist-to-height ratio ( $\geq 0.5$ )                                         |      |      |            |      |            |      |      |            |       |            |      |      |            |      |            |
| Adjusted                                                                          | 1.00 | 0.72 | 0.080-6.45 | 0.63 | 0.061-6.58 | 1.00 | 5.72 | 0.13-244.9 | 0.58  | 0.079-4.26 | 1.00 | 0.45 | 0.050-4.08 | 0.64 | 0.051-8.18 |
| Vitamin D deficiency [serum 25(OH)D $<12$ ng/ml]                                  |      |      |            |      |            |      |      |            |       |            |      |      |            |      |            |
| Adjusted                                                                          | 1.00 | 2.44 | 0.54-11.09 | 1.49 | 0.11-21.13 | 1.00 | 0.20 | 0.028-1.49 | 0.063 | 0.005-0.75 | 1.00 | 0.34 | 0.047-2.43 | 0.87 | 0.14-5.29  |
| Chronic kidney disease (eGFR $< 60$ mL/min/1.73m <sup>2</sup> or ACR $> 30$ mg/g) |      |      |            |      |            |      |      |            |       |            |      |      |            |      |            |
| Adjusted                                                                          | 1.00 | 0.64 | 0.11-3.75  | 1.31 | 0.21-8.27  | 1.00 | 2.96 | 0.49-17.68 | 3.61  | 0.56-23.48 | 1.00 | 3.33 | 0.54-20.64 | 2.94 | 0.40-21.61 |
| Nephrolithiasis (yes)                                                             |      |      |            |      |            |      |      |            |       |            |      |      |            |      |            |
| Adjusted                                                                          | 1.00 | 0.63 | 0.22-1.84  | 0.94 | 0.25-3.51  | 1.00 | 0.49 | 0.16-1.54  | 0.57  | 0.18-1.82  | 1.00 | 1.12 | 0.37-3.41  | 0.58 | 0.17-1.96  |

Ref: reference values. SBP systolic blood pressure; DBP diastolic blood pressure; ABPM ambulatory blood pressure monitoring ( $n=193$ ); TG triglycerides; HDLc high-density lipoproteins cholesterol; BMI body mass index; 25(OH)D 25-Hydroxy-Vitamin-D. eGFR estimated glomerular filtration rate; ACR: urinary albumin to creatinine ratio.

Arterial stiffness was defined as a pulse wave velocity  $> 10$  m/s ( $n=174$ ). Chronic kidney disease was defined as an eGFR  $< 60$  mL/min/1.73m<sup>2</sup> or an ACR  $> 30$  mg/g based on a single determination ( $n=155$ ). Nephrolithiasis was defined according to report (yes/no). Multivariable: adjusted for continuous variables: BMI, daily energy intake and categorical variables: sex, smoking status (current smoking: yes/no), physical activity (inactive  $< 600$  mets/min per week, active  $\geq 600$  mets/min per week) and education ( $\leq 9$  years,  $> 9$  years). For 25(OH)D they were additionally adjusted for season (summer, autumn, winter, spring), and for BP for use of antihypertensive drugs (yes/no). Results for hypertension, and in younger participants ( $\leq 54$  years) additionally arterial stiffness, vitamin D deficiency, chronic kidney disease and nephrolithiasis are not shown as there is possibly a quasi-complete separation of data points and validity of the model fit is questionable.

**Table S7.** General adjusted Odds ratio (OR) and 95% confidence intervals (CI) for cardiovascular and renal risk phenotypes according to tertiles (T) of dietary pattern and sex in Uruguayan adults

| Women                                                                                              |         |      |            |      |            |            |      |            |      |            |                    |      |            |      |            |
|----------------------------------------------------------------------------------------------------|---------|------|------------|------|------------|------------|------|------------|------|------------|--------------------|------|------------|------|------------|
| Variables                                                                                          | Meat DP |      |            |      |            | Prudent DP |      |            |      |            | Cereal and Mate DP |      |            |      |            |
|                                                                                                    | T1      | T2   |            | T3   |            | T1         | T2   |            | T3   |            | T1                 | T2   |            | T3   |            |
|                                                                                                    | Ref     | OR   | 95% CI     | OR   | 95% CI     | Ref        | OR   | 95% CI     | OR   | 95% CI     | Ref                | OR   | 95% CI     | OR   | 95% CI     |
| Hypertension (Office SBP $\geq 140$ mm Hg or DBP $\geq 90$ mm Hg or use of antihypertensive drugs) |         |      |            |      |            |            |      |            |      |            |                    |      |            |      |            |
| Adjusted                                                                                           | 1.00    | 2.04 | 0.56-7.54  | 0.19 | 0.016-2.29 | 1.00       | 1.03 | 0.24-4.38  | 1.25 | 0.31-4.99  | 1.00               | 1.49 | 0.38-5.89  | 0.64 | 0.12-3.50  |
| Uncontrolled hypertension by office measurement (SBP $\geq 140$ mm Hg or DBP $\geq 90$ mm Hg)      |         |      |            |      |            |            |      |            |      |            |                    |      |            |      |            |
| Adjusted                                                                                           | 1.00    | 1.23 | 0.51-2.96  | 0.38 | 0.097-1.50 | 1.00       | 0.95 | 0.34-2.66  | 1.73 | 0.67-4.49  | 1.00               | 1.51 | 0.58-3.94  | 1.20 | 0.40-3.64  |
| Uncontrolled hypertension by ABPM measurement (SBP $\geq 130$ mm Hg or DBP $\geq 80$ mm Hg)        |         |      |            |      |            |            |      |            |      |            |                    |      |            |      |            |
| Adjusted                                                                                           | 1.00    | 1.03 | 0.37-2.86  | 0.95 | 0.26-3.52  | 1.00       | 1.02 | 0.33-3.17  | 1.19 | 0.40-3.49  | 1.00               | 2.42 | 0.73-8.02  | 2.78 | 0.77-9.99  |
| Arterial stiffness (pulse wave velocity $> 10$ m/s)                                                |         |      |            |      |            |            |      |            |      |            |                    |      |            |      |            |
| Adjusted                                                                                           | 1.00    | 3.03 | 0.61-15.0  | 3.03 | 0.36-25.5  | 1.00       | 15.3 | 1.87-125.7 | 2.91 | 0.56-15.11 | 1.00               | 1.10 | 0.26-4.60  | 0.64 | 0.12-3.59  |
| High TG/HDLc ratio ( $> 3.0$ )                                                                     |         |      |            |      |            |            |      |            |      |            |                    |      |            |      |            |
| Adjusted                                                                                           | 1.00    | 1.06 | 0.48-2.31  | 1.24 | 0.47-3.28  | 1.00       | 1.08 | 0.49-2.40  | 0.63 | 0.28-1.43  | 1.00               | 0.61 | 0.28-1.34  | 0.75 | 0.30-1.85  |
| Overweight (BMI $\geq 25 < 30$ kg/m <sup>2</sup> )                                                 |         |      |            |      |            |            |      |            |      |            |                    |      |            |      |            |
| Adjusted                                                                                           | 1.00    | 2.04 | 0.95-4.38  | 0.91 | 0.35-2.37  | 1.00       | 1.28 | 0.58-2.80  | 1.18 | 0.54-2.57  | 1.00               | 1.47 | 0.67-3.23  | 1.43 | 0.58-3.49  |
| Overweight and Obesity (BMI $> 25$ kg/m <sup>2</sup> )                                             |         |      |            |      |            |            |      |            |      |            |                    |      |            |      |            |
| Adjusted                                                                                           | 1.00    | 1.11 | 0.48-5.40  | 0.07 | 0.51-0.02  | 1.00       | 3.27 | 1.21-8.83  | 1.09 | 0.47-2.50  | 1.00               | 2.33 | 1.00-5.39  | 2.54 | 0.95-6.77  |
| High waist-to-height ratio ( $\geq 0.5$ )                                                          |         |      |            |      |            |            |      |            |      |            |                    |      |            |      |            |
| Adjusted                                                                                           | 1.00    | 0.61 | 0.16-2.32  | 1.96 | 0.43-8.89  | 1.00       | 0.89 | 0.19-4.12  | 0.70 | 0.19-2.60  | 1.00               | 0.42 | 0.11-1.63  | 0.86 | 0.17-4.34  |
| Vitamin D deficiency [serum 25(OH)D $< 12$ ng/ml]                                                  |         |      |            |      |            |            |      |            |      |            |                    |      |            |      |            |
| Adjusted                                                                                           | 1.00    | 8.53 | 1.92-37.84 | 6.03 | 0.87-41.76 | 1.00       | 0.40 | 0.10-1.53  | 0.23 | 0.048-1.09 | 1.00               | 0.62 | 0.17-2.23  | 0.80 | 0.19-3.42  |
| Chronic kidney disease (eGFR $< 60$ mL/min/1.73m <sup>2</sup> or ACR $> 30$ mg/g)                  |         |      |            |      |            |            |      |            |      |            |                    |      |            |      |            |
| Adjusted                                                                                           | 1.00    | 1.94 | 0.17-22.5  | 4.75 | 0.25-90.20 | 1.00       | 1.38 | 0.14-13.48 | 4.89 | 0.62-38.68 | 1.00               | 2.14 | 0.16-28.33 | 4.60 | 0.34-63.0  |
| Nephrolithiasis (yes)                                                                              |         |      |            |      |            |            |      |            |      |            |                    |      |            |      |            |
| Adjusted                                                                                           | 1.00    | 0.88 | 0.24-3.17  | 1.45 | 0.30-6.88  | 1.00       | 1.35 | 0.37-4.97  | 1.19 | 0.31-4.56  | 1.00               | 1.08 | 0.34-3.44  | 0.18 | 0.027-1.15 |
| Men                                                                                                |         |      |            |      |            |            |      |            |      |            |                    |      |            |      |            |
| Variables                                                                                          | Meat DP |      |            |      |            | Prudent DP |      |            |      |            | Cereal and Mate DP |      |            |      |            |

|                                                                                                    | T1   | T2   |            | T3   |            | T1   | T2   |            | T3    |            | T1   | T2   |            | T3   |            |
|----------------------------------------------------------------------------------------------------|------|------|------------|------|------------|------|------|------------|-------|------------|------|------|------------|------|------------|
|                                                                                                    | Ref  | OR   | 95% CI     | OR   | 95% CI     | Ref  | OR   | 95% CI     | OR    | 95% CI     | Ref  | OR   | 95% CI     | OR   | 95% CI     |
| Hypertension (Office SBP $\geq 140$ mm Hg or DBP $\geq 90$ mm Hg or use of antihypertensive drugs) |      |      |            |      |            |      |      |            |       |            |      |      |            |      |            |
| Adjusted                                                                                           | 1.00 | 4.73 | 0.39-58.16 | 0.81 | 0.075-8.78 | 1.00 | 9.70 | 0.44-213.2 | 13.27 | 0.64-275.8 | 1.00 | 0.51 | 0.047-5.41 | 0.33 | 0.031-3.55 |
| Uncontrolled hypertension by office BP measurement (SBP $\geq 140$ mm Hg or DBP $\geq 90$ mm Hg)   |      |      |            |      |            |      |      |            |       |            |      |      |            |      |            |
| Adjusted                                                                                           | 1.00 | 1.31 | 0.32-5.41  | 0.68 | 0.13-3.47  | 1.00 | 2.86 | 0.62-13.28 | 2.28  | 0.44-11.89 | 1.00 | 0.22 | 0.034-1.48 | 0.38 | 0.089-1.59 |
| Uncontrolled hypertension by ABPM (SBP $\geq 130$ mm Hg or DBP $\geq 80$ mm Hg)                    |      |      |            |      |            |      |      |            |       |            |      |      |            |      |            |
| Adjusted                                                                                           | 1.00 | 0.81 | 0.17-3.84  | 9.02 | 1.32-61.5  | 1.00 | 0.45 | 0.093-2.22 | 0.74  | 0.15-3.57  | 1.00 | 0.55 | 0.089-3.45 | 0.19 | 0.036-1.04 |
| Arterial stiffness (pulse wave velocity $> 10$ m/s)                                                |      |      |            |      |            |      |      |            |       |            |      |      |            |      |            |
| Adjusted                                                                                           | 1.00 | 3.74 | 0.30-46.62 | 8.63 | 0.27-274.4 | 1.00 | 0.49 | 0.028-8.51 | 0.60  | 0.041-8.81 | 1.00 | 0.14 | 0.003-6.24 | 0.08 | 0.002-3.54 |
| High TG/HDLc ratio ( $> 3.75$ )                                                                    |      |      |            |      |            |      |      |            |       |            |      |      |            |      |            |
| Adjusted                                                                                           | 1.00 | 0.66 | 0.16-2.66  | 0.97 | 0.25-3.87  | 1.00 | 3.17 | 0.90-11.22 | 1.65  | 0.44-6.19  | 1.00 | 0.41 | 0.092-1.85 | 0.90 | 0.27-2.94  |
| Overweight (BMI $\geq 25 < 30$ kg/m <sup>2</sup> )                                                 |      |      |            |      |            |      |      |            |       |            |      |      |            |      |            |
| Adjusted                                                                                           | 1.00 | 0.50 | 0.15-1.67  | 0.71 | 0.21-2.45  | 1.00 | 0.87 | 0.30-2.57  | 2.66  | 0.87-8.15  | 1.00 | 4.00 | 1.13-14.17 | 6.57 | 1.99-21.67 |
| Overweight and Obesity (BMI $> 25$ kg/m <sup>2</sup> )                                             |      |      |            |      |            |      |      |            |       |            |      |      |            |      |            |
| Adjusted                                                                                           | 1.00 | 0.31 | 0.050-1.99 | 0.40 | 0.060-2.75 | 1.00 | 2.70 | 0.65-11.23 | 3.11  | 0.69-14.1  | 1.00 | 2.36 | 0.47-11.7  | 2.36 | 0.58-9.73  |
| Nephrolithiasis (yes)                                                                              |      |      |            |      |            |      |      |            |       |            |      |      |            |      |            |
| Adjusted                                                                                           | 1.00 | 0.91 | 0.20-4.15  | 1.58 | 0.31-8.08  | 1.00 | 0.19 | 0.039-0.90 | 0.36  | 0.076-1.70 | 1.00 | 1.16 | 0.24-5.53  | 1.06 | 0.26-4.38  |

Ref: reference values. SBP systolic blood pressure; DBP diastolic blood pressure; ABPM ambulatory blood pressure monitoring; TG triglycerides; HDLc high-density lipoproteins cholesterol; BMI body mass index; 25(OH)D 25-Hydroxy-Vitamin-D. eGFR estimated glomerular filtration rate; ACR: urinary albumin to creatinine ratio.

Arterial stiffness was defined as a pulse wave velocity  $> 10$  m/s ( $n = 174$ ). Chronic kidney disease was defined as an eGFR  $< 60$  mL/min/1.73m<sup>2</sup> or an ACR  $> 30$  mg/g based on a single determination ( $n = 155$ ). Nephrolithiasis was defined according to report (yes/no). Models adjusted for continuous variables: age, BMI, daily energy intake and categorical variables: smoking status (current smoking: yes/no), physical activity (inactive  $< 600$  mets/min per week, active  $\geq 600$  mets/min per week) and education ( $\leq 9$  years,  $> 9$  years). For 25(OH)D they were additionally adjusted for season (summer, autumn, winter, spring), and for BP for use of antihypertensive drugs (yes/no). In men, results for waist-to-height ratio, vitamin D deficiency and chronic kidney disease are not shown as there is possibly a quasi-complete separation of data points and validity of the model fit is questionable.
